# Supplementary material for: Assessment of Air Quality and Meteorological Changes Induced by Future Vegetation in Madrid
Source: MDPI journal article supplement (doi:10.3390/f13050690), 2022-04-29
Supplement: s1 [file s1]

# Assessment of air quality and meteorological changes induced by future vegetation in Madrid

## Supplementary Materials

**Table S1.** Dimensions and spatial resolution of WRF and CMAQ modelling domains

| Domains | Geographic area     | WRF X-Y<br>Dimensions<br>(km) | CMAQ X-Y<br>Dimensions<br>(km) | Horizontal<br>resolution<br>(km) |
|---------|---------------------|-------------------------------|--------------------------------|----------------------------------|
| D1      | Europe              | 248 x 220                     | 187 x 176                      | 27                               |
| D2      | Iberian peninsula   | 159 x 129                     | 131 x 99                       | 9                                |
| D3      | Spain central area  | 84 x 87                       | 60 x 60                        | 3                                |
| D4      | Greater Madrid area | 159 x 168                     | 136 x 144                      | 1                                |

**Table S2.** Air quality parameter regulated by the Directive 2008/50/EC on ambient air quality and cleaner air for Europe

| Average time | NO <sub>2</sub> (µg m <sup>-3</sup> ) | O <sub>3</sub> (µg m <sup>-3</sup> ) | PM <sub>10</sub> (µg m <sup>-3</sup> ) | PM <sub>2.5</sub> (µg m <sup>-3</sup> ) |
|--------------|---------------------------------------|--------------------------------------|----------------------------------------|-----------------------------------------|
| Annual mean  | 40                                    | -                                    | 40                                     | 20                                      |
| Daily mean   | -                                     | 120 <sup>2</sup>                     | 50 <sup>3</sup>                        | -                                       |
| Hourly mean  | 200 <sup>1</sup>                      | -                                    | -                                      | -                                       |

<sup>1</sup> Not to be exceeded more than 18 times per calendar year

<sup>2</sup> Maximum daily eight-hour mean. Not to be exceeded more than 25 times per calendar year

<sup>3</sup> Not to be exceeded more than 35 times per calendar year

**Table S3.** Properties of relevant natural-land uses (WRF VEGPARM file)

| Parameters | 1      | 2      | 3     | 4      | 5     | 6     | 7     | 8     | 9     | 10    | 11    | 12    | 13    | 14    | 15     | 16     |
|------------|--------|--------|-------|--------|-------|-------|-------|-------|-------|-------|-------|-------|-------|-------|--------|--------|
| SHDFAC     | 0.80   | 0.79   | 0.80  | 0.79   | 0.79  | 0.77  | 0.76  | 0.80  | 0.79  | 0.80  | 0.79  | 0.80  | 0.78  | 0.76  | 0.70   | 0.71   |
| NROOT      | 3.00   | 4.00   | 3.00  | 4.00   | 3.00  | 3.00  | 4.00  | 3.00  | 3.00  | 3.00  | 3.00  | 3.00  | 3.00  | 4.00  | 3.00   | 3.00   |
| RS         | 40.00  | 104.00 | 40.40 | 104.00 | 49.10 | 69.80 | 92.50 | 40.40 | 56.20 | 70.20 | 80.00 | 40.60 | 62.00 | 84.70 | 169.70 | 159.10 |
| RGL        | 100.00 | 30.00  | 99.70 | 30.00  | 91.80 | 73.20 | 52.80 | 99.70 | 85.40 | 64.80 | 57.70 | 99.40 | 80.20 | 59.80 | 99.70  | 85.40  |
| HS         | 36.25  | 53.00  | 36.32 | 53.00  | 37.80 | 41.31 | 45.17 | 36.32 | 39.01 | 44.17 | 45.25 | 36.45 | 40.06 | 43.89 | 39.23  | 41.33  |
| SNUP       | 0.04   | 0.08   | 0.04  | 0.08   | 0.04  | 0.06  | 0.07  | 0.04  | 0.05  | 0.04  | 0.05  | 0.04  | 0.05  | 0.06  | 0.04   | 0.04   |
| MAXALB     | 66.00  | 57.00  | 65.90 | 57.00  | 64.60 | 61.30 | 57.60 | 65.90 | 63.40 | 60.00 | 58.70 | 69.90 | 65.40 | 60.60 | 64.90  | 62.60  |
| LAIMIN     | 1.56   | 2.29   | 1.57  | 2.29   | 1.85  | 2.50  | 3.22  | 1.57  | 2.07  | 2.01  | 2.42  | 0.55  | 1.51  | 2.53  | 0.62   | 1.31   |
| LAIMAX     | 5.68   | 3.78   | 5.68  | 3.78   | 5.65  | 5.60  | 5.53  | 5.68  | 5.63  | 4.01  | 4.31  | 2.92  | 3.63  | 4.37  | 2.61   | 3.20   |
| EMISSMIN   | 0.92   | 0.93   | 0.92  | 0.93   | 0.92  | 0.93  | 0.94  | 0.93  | 0.93  | 0.93  | 0.93  | 0.92  | 0.93  | 0.93  | 0.93   | 0.93   |
| EMISSMAX   | 0.99   | 0.93   | 0.98  | 0.93   | 0.98  | 0.97  | 0.96  | 0.99  | 0.98  | 0.99  | 0.98  | 0.96  | 0.96  | 0.95  | 0.95   | 0.95   |
| ALBEDOMIN  | 0.17   | 0.15   | 0.17  | 0.15   | 0.17  | 0.16  | 0.14  | 0.20  | 0.19  | 0.16  | 0.15  | 0.19  | 0.17  | 0.16  | 0.22   | 0.20   |
| ALBEDOMAX  | 0.23   | 0.16   | 0.23  | 0.16   | 0.22  | 0.19  | 0.17  | 0.25  | 0.23  | 0.20  | 0.19  | 0.23  | 0.20  | 0.18  | 0.30   | 0.27   |
| Z0MIN      | 0.05   | 0.50   | 0.05  | 0.50   | 0.10  | 0.22  | 0.35  | 0.02  | 0.12  | 0.20  | 0.26  | 0.10  | 0.21  | 0.33  | 0.01   | 0.11   |
| Z0MAX      | 0.15   | 0.50   | 0.15  | 0.50   | 0.19  | 0.28  | 0.39  | 0.10  | 0.18  | 0.20  | 0.26  | 0.12  | 0.23  | 0.34  | 0.06   | 0.15   |

1 Dryland, Cropland and Pasture

2 Average urban tree in Madrid

3 Metropolitan forest

4 Dryland, Cropland and Pasture and (0 – 5%) Metropolitan forest

5 Dryland, Cropland and Pasture and (5 –20%) Metropolitan forest

6 Dryland, Cropland and Pasture and (20 – 50%) Metropolitan forest

7 Dryland, Cropland and Pasture and (50 –90%) Metropolitan forest

8 Irrigated Cropland and Pasture and (0 – 5%) Metropolitan forest

9 Irrigated Cropland and Pasture and (>5%) Metropolitan forest

10 Cropland/Woodland Mosaic and (0 – 5%) Metropolitan forest

11 Cropland/Woodland Mosaic (>5%) Metropolitan forest

12 Grassland (0 – 10%) Metropolitan forest

13 Grassland (20 – 40%) Metropolitan forest

14 Grassland (>40%) Metropolitan forest

15 Mixed Shrubland/Grassland (0 - 5%) Metropolitan forest

16 Mixed Shrubland/Grassland (> 5%) Metropolitan forest

### Meteorological evaluation

To gain confidence in the results of the meteorological model, we performed a statistical assessment for the whole year 2015 using hourly observations of the main variables (temperature at 2 m height, relative humidity, wind speed and wind direction). In addition, we incorporated estimations of the planetary boundary layer height from a SODAR-RASS instrument operated by Madrid City Hall. In our analysis, we include all the meteorological stations from NOAA in our modelling domain, as well as observations from Madrid's meteorological network (Table S-met), totalizing more than 400000 observations.

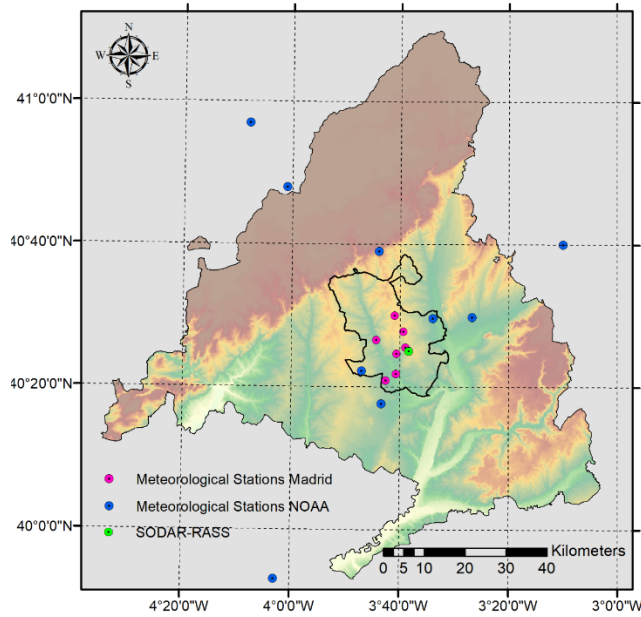

**Figure S-met.** Meteorological stations and SODAR RASS used in evaluation model.

The analysis is stratified for each network, since measurement procedures are not necessarily comparable. In addition, the stations integrated in Madrid's meteorological network are located in urban areas and observations may be affected by local influences, hindering comparability with those integrated in the World Meteorological Network, provided by NOAA. We present the corresponding summaries in Table S4 and Table S5.

We computed a series of common statistics for a comprehensive view of model performance:

**FAC2** - fraction of predictions within a factor of two

**MB** – mean bias

**MGE** - mean gross error

**NMB** - normalized mean bias

**NMGE** - normalized mean gross error

**RMSE** - root mean squared error

**r** - Pearson correlation coefficient

**IOA** - index of agreement

**N**- number of complete pairs of data for that meteorological variable

**Obs. Avg** – mean observed value

**Model Avg** – mean predicted WRF value

Table S4. Statistical evaluation of the meteorological simulations (NOAA meteorological stations)

| Statistic        | T (2m) | RH    | WS (10m)                | WD (10m) |
|------------------|--------|-------|-------------------------|----------|
| <b>FAC2</b>      | 0.95   | 0.99  | 0.62                    | 0.72     |
| <b>MB</b>        | -0.2°C | -0.3% | -0.21 m s <sup>-1</sup> | -7.81°   |
| <b>MGE</b>       | 1.4°C  | 6.8%  | 1.6 m s <sup>-1</sup>   | 69.25°   |
| <b>NMB</b>       | 0.0    | 0.0   | -0.07                   | -0.04    |
| <b>NMGE</b>      | 0.1    | 0.1   | 0.5                     | 0.4      |
| <b>RMSE</b>      | 1.9°C  | 9.2%  | 2.19 m s <sup>-1</sup>  | 113.5°   |
| <b>r</b>         | 0.98   | 0.93  | 0.62                    | 0.47     |
| <b>IOA</b>       | 0.91   | 0.84  | 0.53                    | 0.62     |
| <b>N</b>         | 49914  | 49901 | 43536                   | 43536    |
| <b>Obs. Avg</b>  | 16.0°C | 55.5% | 3.1 m s <sup>-1</sup>   | 181.3°   |
| <b>Model Avg</b> | 15.8°C | 55.2% | 2.9 m s <sup>-1</sup>   | 173.5°   |

Table S5. Statistical evaluation of the meteorological simulations (Madrid meteorological network stations)

| Statistic        | T (2m) | RH    | WS (10m)                | WD (10m) | PBL Height |
|------------------|--------|-------|-------------------------|----------|------------|
| <b>FAC2</b>      | 0.87   | 0.98  | 0.42                    | 0.67     | 0.41       |
| <b>MB</b>        | 2.0°C  | -0.3% | -0.12 m s <sup>-1</sup> | 3.18°    | 84.5 m     |
| <b>MGE</b>       | 2.4°C  | 7.9%  | 0.79 m s <sup>-1</sup>  | 75.77°   | 473.4 m    |
| <b>NMB</b>       | 0.14   | -0.01 | -0.1                    | 0.02     | 0.15       |
| <b>NMGE</b>      | 0.17   | 0.15  | 0.66                    | 0.49     | 0.8        |
| <b>RMSE</b>      | 3.2°C  | 10.8% | 1.02 m s <sup>-1</sup>  | 114.1°   | 728.1 m    |
| <b>r</b>         | 0.97   | 0.88  | 0.51                    | 0.42     | 0.62       |
| <b>IOA</b>       | 0.84   | 0.80  | 0.53                    | 0.61     | -0.01      |
| <b>N</b>         | 51521  | 51521 | 51521                   | 51521    | 8265       |
| <b>Obs. Avg</b>  | 14.3°C | 52.5% | 1.2 m s <sup>-1</sup>   | 154.9°   | 564.7 m    |
| <b>Model Avg</b> | 16.3°C | 52.2% | 1.1 m s <sup>-1</sup>   | 158.1°   | 661.2 m    |

According to these results, we found the results reliable enough to support the analysis proposed, since departures from the observations are within reasonable limits for a mesoscale meteorological model. It can be seen, nonetheless, that WRF presents slightly better results for the NOAA dataset, reported from meteorological stations outside the Madrid urban area.

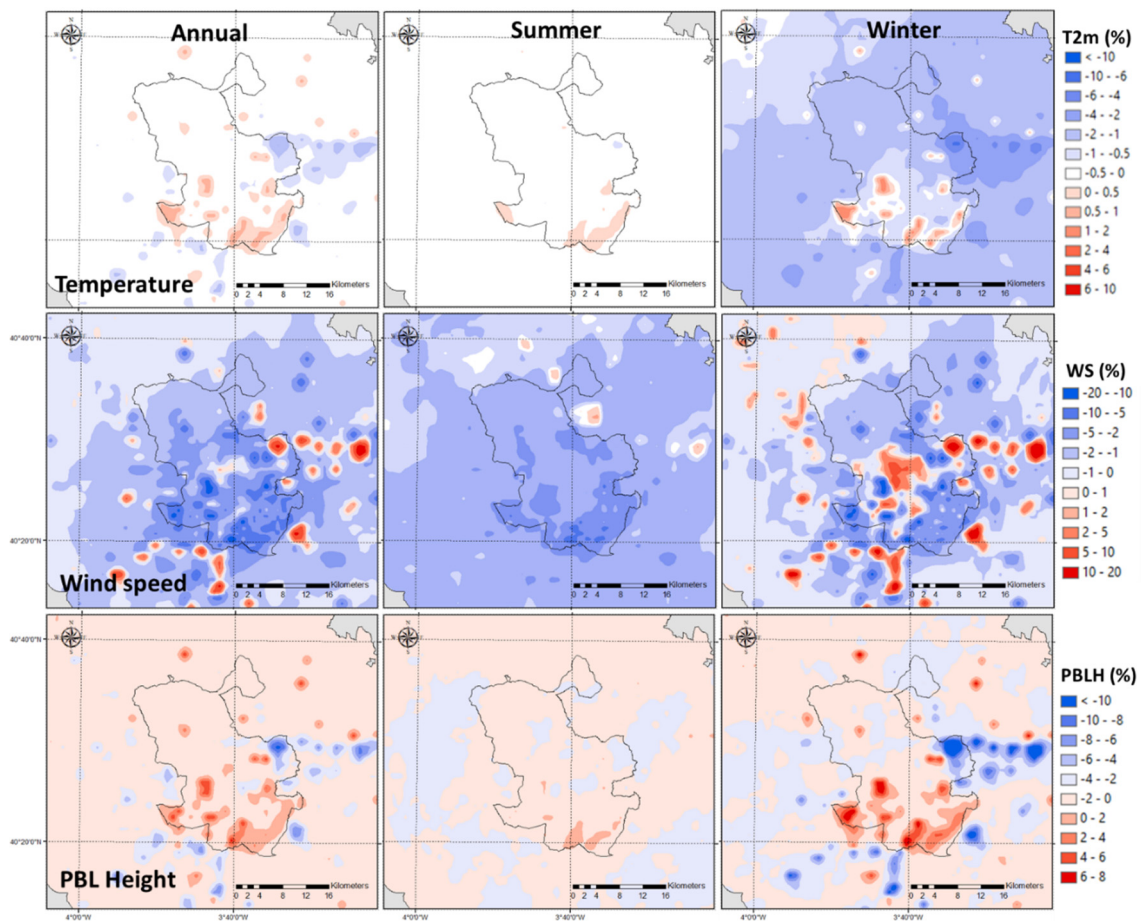

**Figure S1.** Annual mean temperature, wind speed (10m) and PBL height relative changes ( $100 \times (\text{Future} - \text{Baseline}) / \text{Baseline}$ )

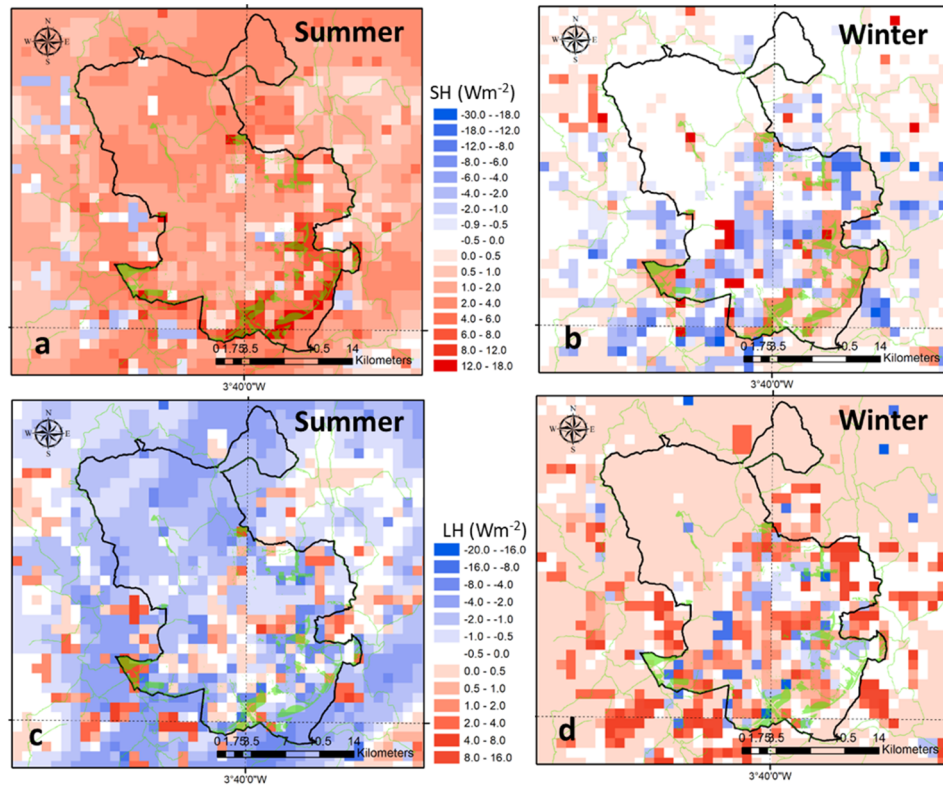

**Figure S2.** Seasonal mean variation (Future-Baseline) sensible heat flux (W m<sup>-2</sup>) at the surface in summer (a) and winter (b). Seasonal mean variation (Future-Baseline) latent heat flux at the surface in summer (c) and winter (d).

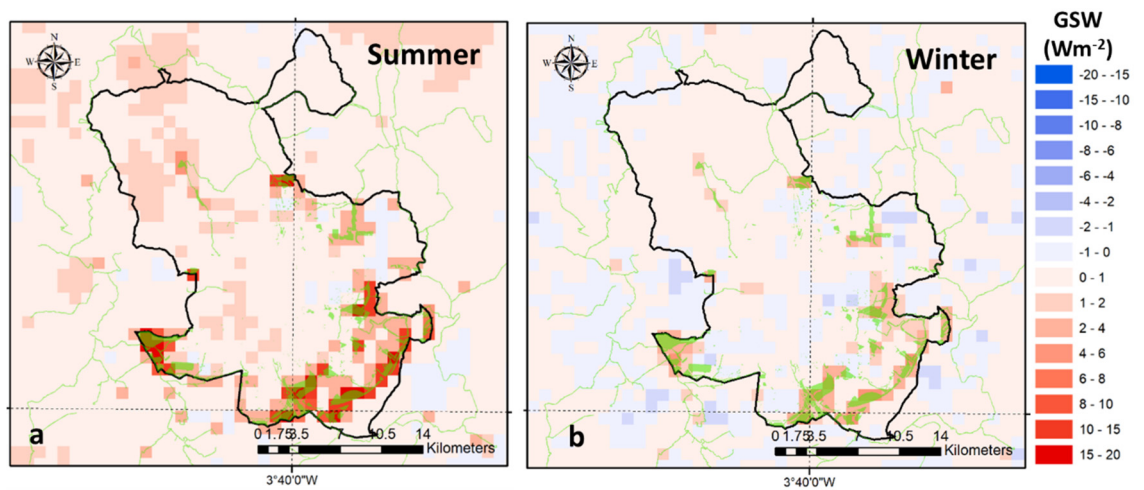

**Figure S3.** Seasonal mean variation (Future-Baseline) of solar radiation absorbed at ground in winter (a) and summer (b)



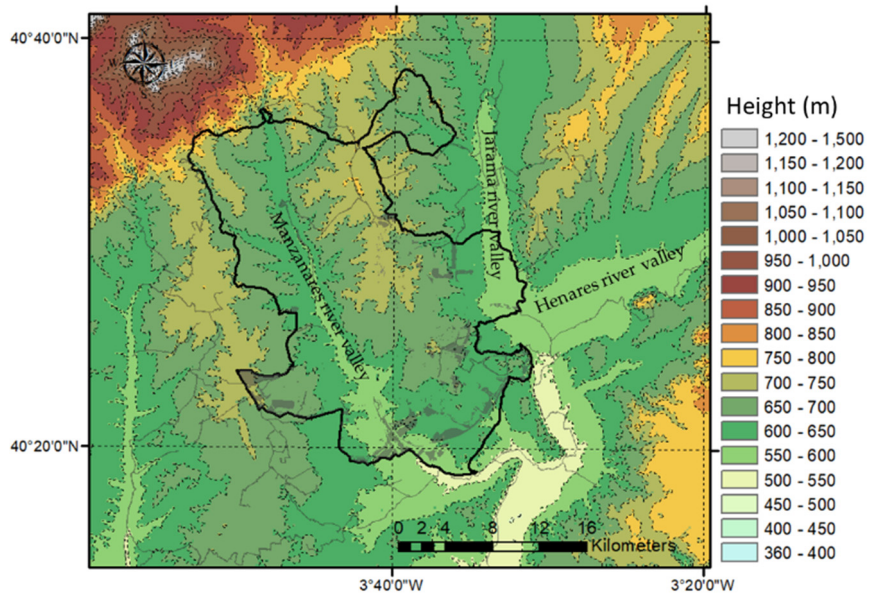

**Figure S4.** Detailed topographic map of the study area

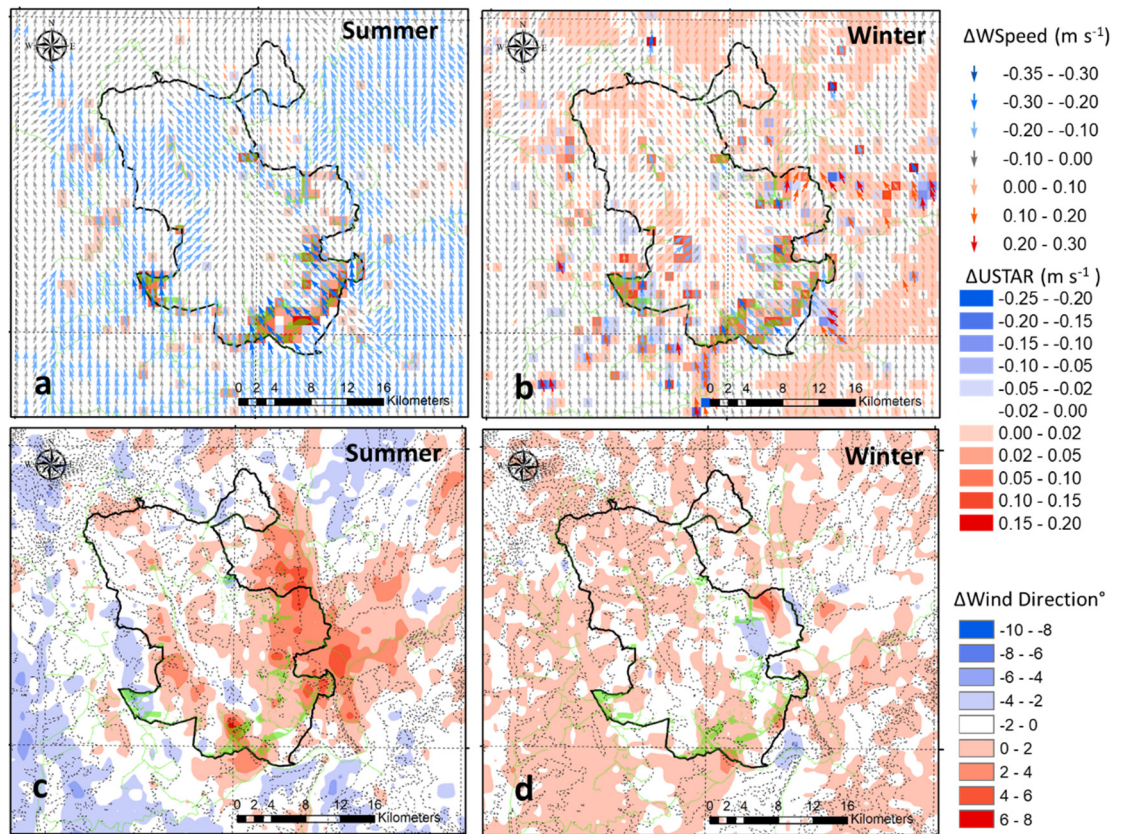

**Figure S5.** Seasonal mean variation (Future-Baseline) of friction velocity ( $\Delta U_{STAR}$ ) and wind speed in summer (a) and winter (b). Seasonal mean variation (Future-Baseline) wind direction in summer (c) and winter (d).

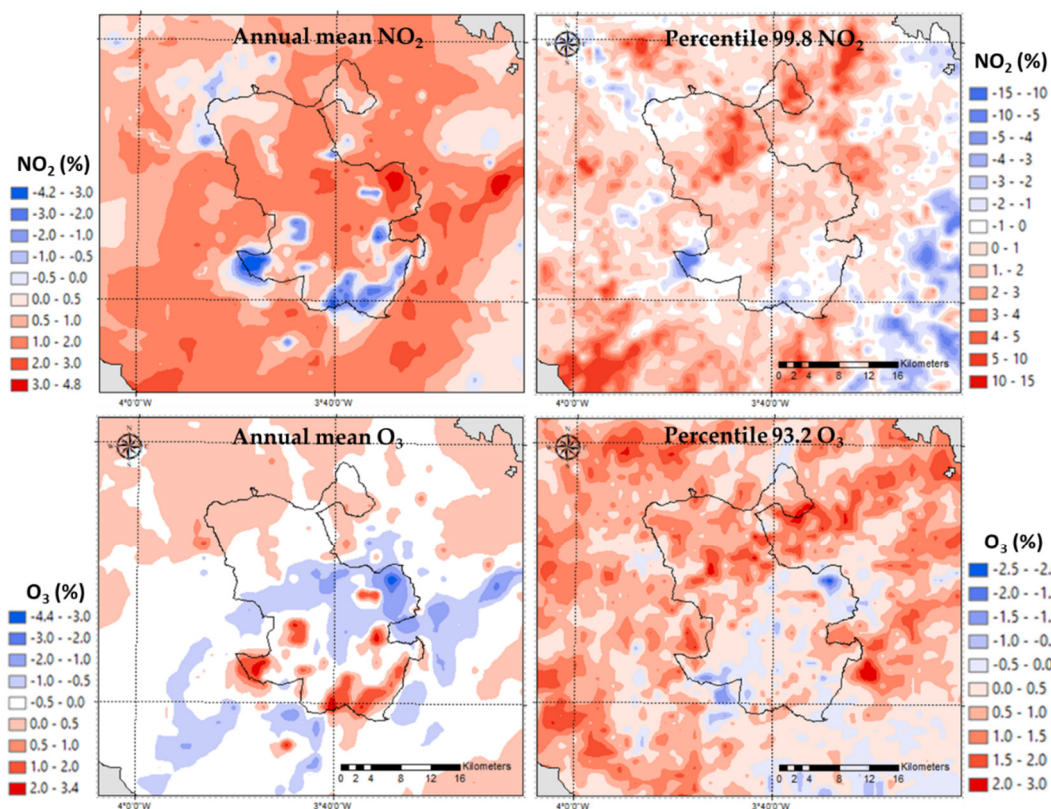

**Figure S6.** NO<sub>2</sub> and O<sub>3</sub> relative changes ( $100 \times (\text{Future} - \text{Baseline}) / \text{Baseline}$ )

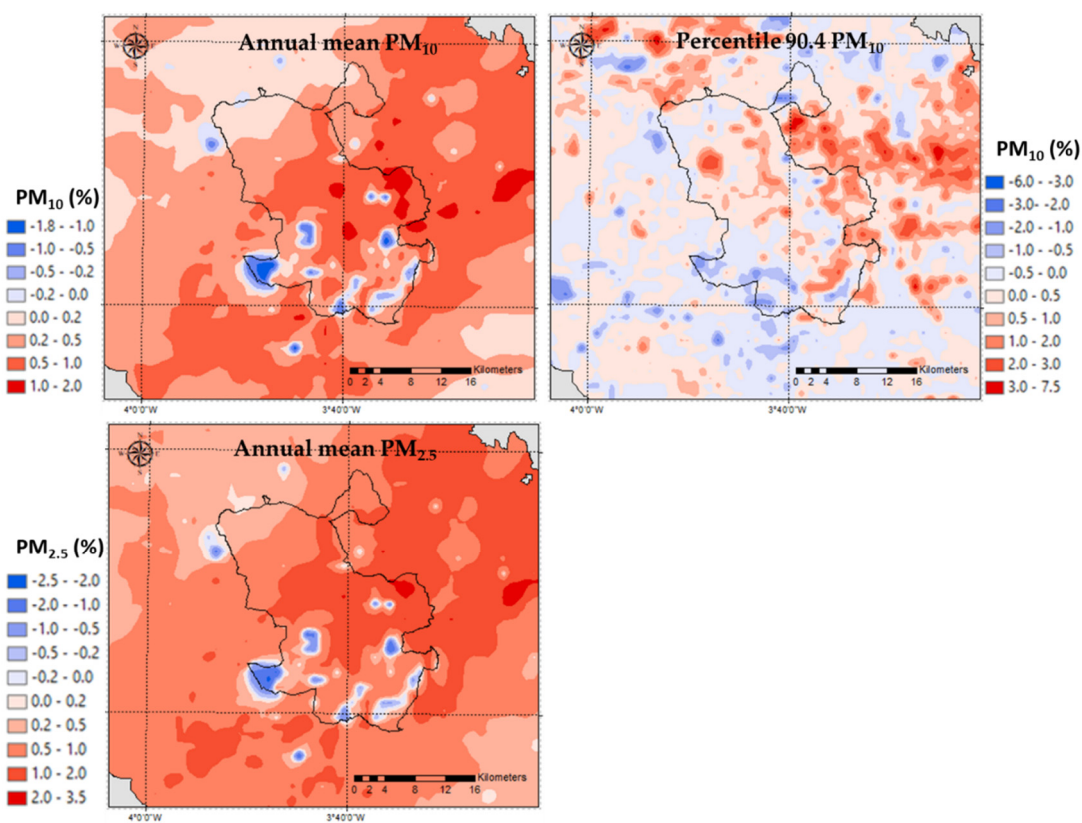

**Figure S7.** PM<sub>10</sub> and PM<sub>2.5</sub> relative changes ( $100 \times (\text{Future} - \text{Baseline}) / \text{Baseline}$ )
